# Supplementary material for: Orexin signaling regulates both the hippocampal clock and the circadian oscillation of Alzheimer’s disease-risk genes
Source: PubMed Central journal article supplement (PMC5086843; doi:10.1038/srep36035), 2016-10-31
Supplement: srep36035-s1.pdf [file srep36035-s1.pdf]

1 **Supplementary Information:**

2

3 **Orexin signaling regulates both the hippocampal clock and the expression of**

4 **Alzheimer's disease-risk genes**

5

6 Zhixiong Ma<sup>1,2</sup>, Weiliang Jiang<sup>3</sup>, & Eric Erquan Zhang<sup>2\*</sup>

7

8 <sup>1</sup>*College of Life Sciences, Beijing Normal University, Beijing 100875, China.*

9 <sup>2</sup>*National Institute of Biological Sciences, Beijing 102206, China.*

10 <sup>3</sup>*Department of Gastroenterology, Shanghai First People's Hospital, School of Medicine, Shanghai Jiao*

11 *Tong University, Shanghai, 200080, China.*

12

13

14 \*Corresponding Email: [zhangerquan@nibs.ac.cn](mailto:zhangerquan@nibs.ac.cn)

15

16

17 **Supplementary Figure Legends:**

18

19 **Supplementary Figure1: Orexin A shortens the period of hippocampal circadian**  
20 **clock.**

21 A and B: Orexin A shortens the period of hippocampal circadian clock in a dose  
22 dependent manner. (C) pre-orexin A treatment and post-orexin A shows the orexin A  
23 shortens the period of hippocampal circadian clock (n=4, \* p< 0.05, paired T-test). D and  
24 E: The EMPA block the effect of orexin B induced shorted period in hippocampus  
25 (n=6-10, \* p<0.05, student's T-test). F and G: The period of hippocampal circadian clock  
26 in aging APP/PS1 mice is shorter than the one in the normal WT mice (n=8-18, \*\* p<  
27 0.01, student's T-test)

28

29 **Supplementary Figure2: Diurnal expression pattern of *orexins***

30 (A)Diurnal expression pattern of *orexin precursor* gene in hypothalamus. . Expression  
31 orexin precursor mRNA was detected by qPCR in the hypothalamus of WT. the  
32 expression of the orexin precursor mRNA is significant different at ZT5 and ZT17 (n=4-5,  
33 \* p< 0.05, student's T-test). (B) Immunostaining of orexin A peptide shows that the  
34 diurnal expression pattern of orexin A is consistent with the one of *orexin precursor* gene  
35 in later hypothalamus area.

36

37 **Supplementary Figure3: The genes are insusceptible to the AD pathology. (A)**

38 Rhythmicity of BACE1 and GSK3 $\alpha$  was unchanged in hippocampus of APP/PS1 mice  
39 (n=3-5, N.S. p>0.05, student's T-test). (B) Rhythmicity of Bmal1, Clock, NR1D1, and  
40 NR1D2 was unchanged in hippocampus of APP/PS1 mice (n=4, \* p< 0.05; N.S. p>0.05,  
41 student's T-test).

42

# Figure S1

A

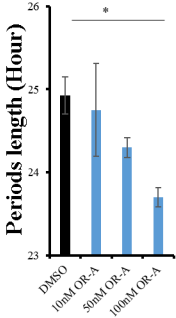

B

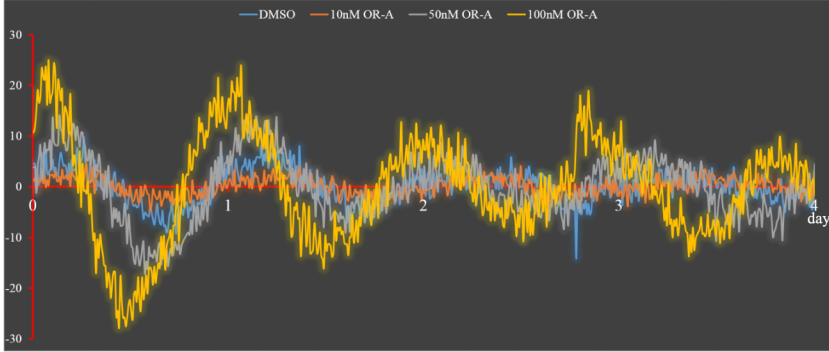

C

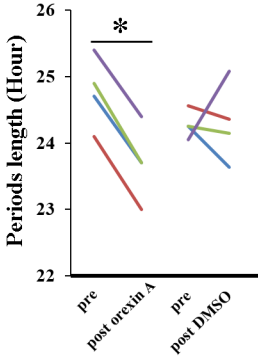

D

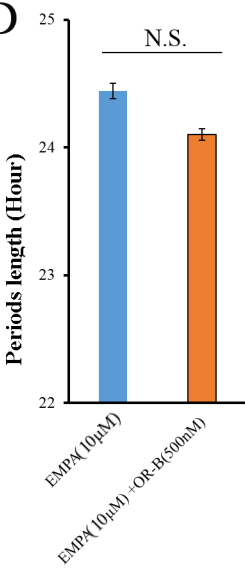

E

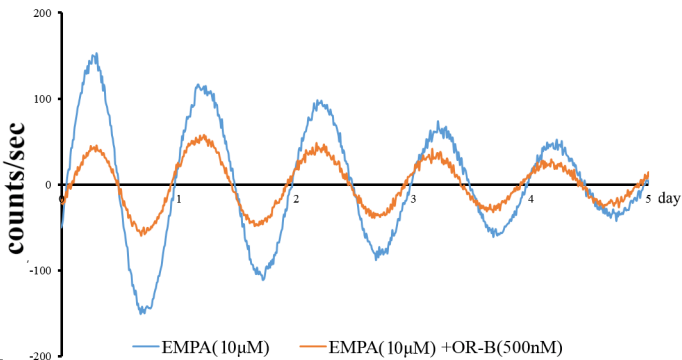

F

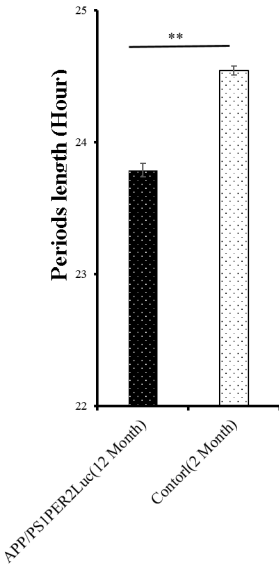

G

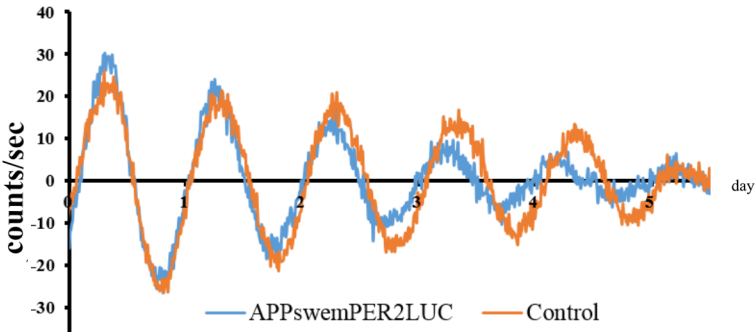

# Figure S2

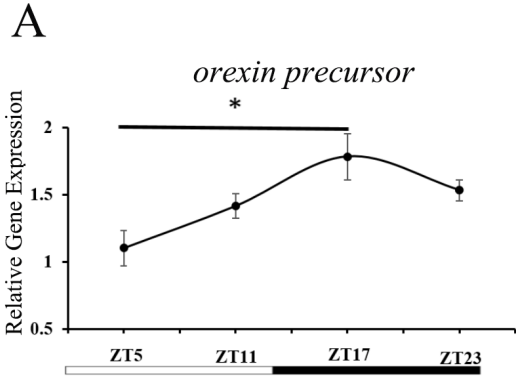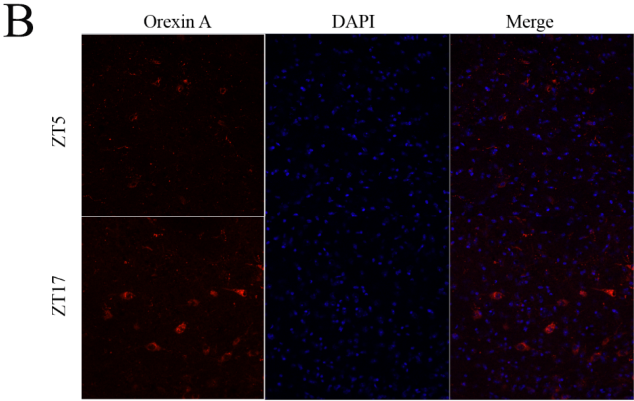



**Figure S3**

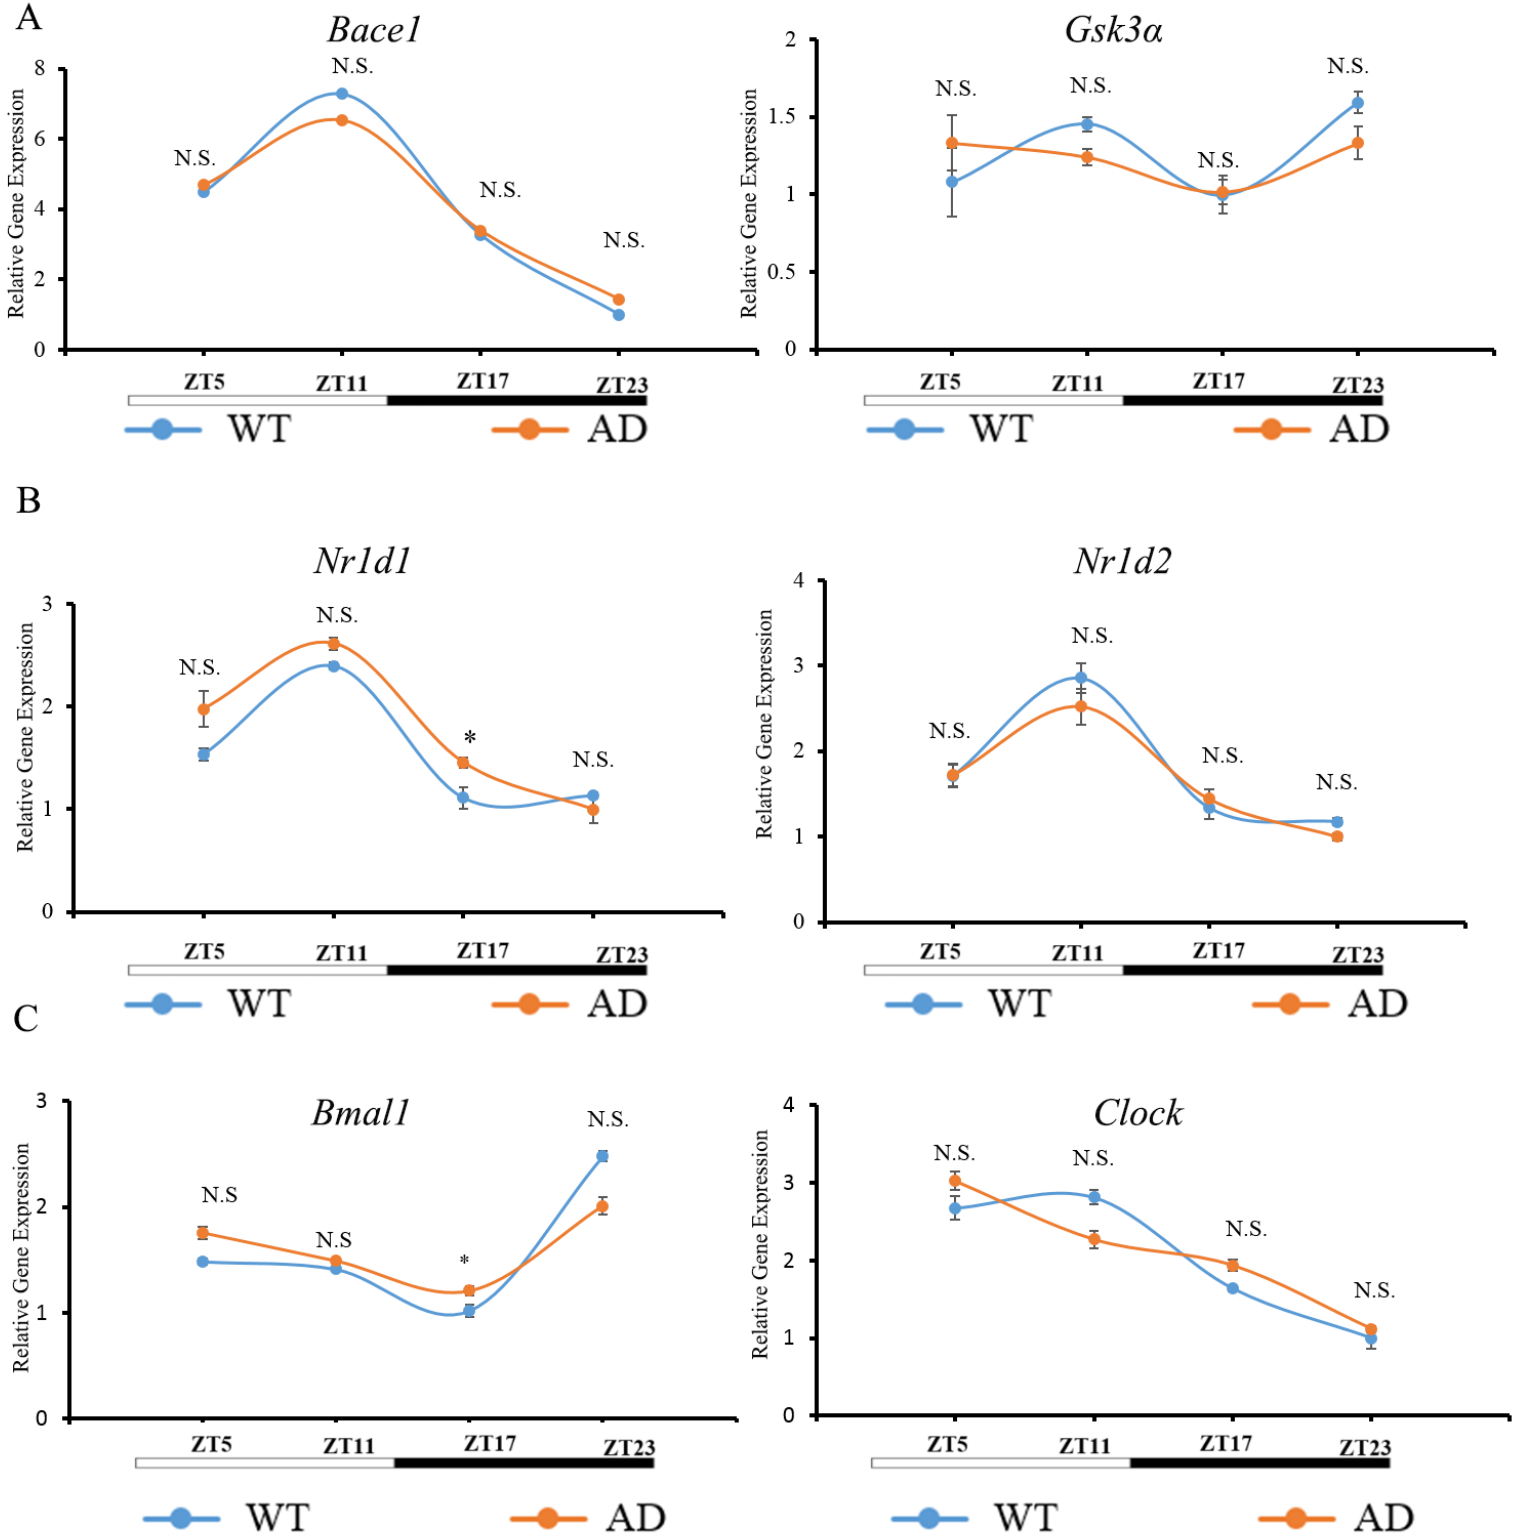

1 **Supplementary Tables:**

2

3 **Supplementary Table 1: qPCR primers of AD-risk genes**

|           |                           |
|-----------|---------------------------|
| A2m-1F    | TCAAAGTTGCAGTACCAGAG      |
| A2m-1R    | TCCCATAGGTGTATATGCCA      |
| Abca1-1F  | GTGTTTCTGGATGAACCAACC     |
| Abca1-1R  | CTTGACAATGCTTAGGGCAC      |
| Ache-1F   | CCTGAAGCCCTTAGAGGTG       |
| Ache-1R   | CTCGTCCAGAGTATCGGTG       |
| Adam10-1F | CTGGACATATTTATGGTGAAGAAGG |
| Adam10-1R | CCACGAGTCTTGATGAAACC      |
| Adam9-1F  | AGATTGCCAGTTCCTTCCA       |
| Adam9-1R  | GAACCGTTGCAGTACTCAG       |
| Apbb1-1F  | ATTGTATCCGCCAGCTCTC       |
| Apbb1-1R  | GCAGATCCTTTCCCTCTCC       |
| Apbb2-1F  | GGGCAAAGACATGTACCTG       |
| Apbb2-1R  | GTAAGCAAAGTCCGTCTCAC      |
| APH1A-1F  | AGCTCCTTAAGAAGGCAGATG     |
| APH1A-1R  | TGATGATACCGAAGGACAGAC     |
| Ap1p1-1F  | GCGAATGAATCAGAGCCTG       |
| Ap1p1-1R  | AGAAGCTCCTGGATCTGTG       |
| Ap1p2-1F  | GGAAATTGATGAGCTCCTTCAG    |
| Ap1p2-1R  | GGGATCTCCTCACTCTCCT       |
| Apoa1-1F  | TGTGGATGCGGTCAAAGACA      |
| Apoa1-1R  | TCCCAGAAGTCCCGAGTCAA      |
| Apoe-1F   | CACATTGCTGACAGGATGC       |
| Apoe-1R   | TAATCCCAGAAGCGGTTTCAG     |
| Apba1-1F  | GAATGGAATTATCTGCAGCCT     |
| Apba1-1R  | ATTTTCGATGATCCGATGTCC     |
| Apba3-1F  | CTCACAGAGACAAGAGAAATCC    |
| Apba3-1R  | TACTGGTTGTTCTGTCCC        |
| App-1F    | ATGTCCCAGGTCATGAGAG       |
| App-1R    | GATAACGGCCTTCTTGTCAG      |
| Bace1-1F  | GTTTCCAAGCTCAACATCCTG     |
| Bace1-1R  | AGTAGCGATGCAGGAAAGG       |
| Bace2-1F  | CACGAACATCTCTGATTCCA      |
| Bace2-1R  | GCGTTTCAGAATTTGTCCAG      |
| Bche-1F   | AAATATGGACATCCCAATGGG     |
| Bche-1R   | GGGAGCACGAAGTTTAGAG       |
| BDNF-1F   | TCATACTTCGGTTGCATGAAGG    |

|          |                          |
|----------|--------------------------|
| BDNF-1R  | ACACCTGGGTAGGCCAAGTT     |
| Capn1-1F | CTATGAGTGGAAACAAAGTGGAC  |
| Capn1-1R | AACGACATCCAGAACTCCC      |
| Casp3-1F | AATGGATTATCCTGAAATGGGC   |
| Casp3-1R | GAGCGAGATGACATTCCAG      |
| Casp4-1F | CAACAATTGCCACTGTCCA      |
| Casp4-1R | TTCTCCAGAGTTCCACCT       |
| CDC2-1F  | AAATTGGAGAAGGTACTTACGG   |
| CDC2-1R  | CTCCTTCTTCCTCGCTTTC      |
| Cdk5-1F  | GATTGTGAAGTCATTCCCTCTTCC |
| Cdk5-1R  | TTCAGGTCCCTATGTAGCAC     |
| Cdk11-1F | GCACCAGCAAGTATTTAGC      |
| Cdk11-1R | CAACTCAAGTGTTCCATGTC     |
| Chat-1F  | TGGGATCTGGCAACTTCGTC     |
| Chat-1R  | AGCACCTCCTCACAGCTAGA     |
| Clu-1F   | ATACCTGCATGAAGTTCTATGC   |
| Clu-1R   | GGTTTAGAACTCCTCTAGCTG    |
| Ctsb-1F  | TATCCCTCTGGAGCATGGA      |
| Ctsb-1R  | TGGTAAGCAGCCTACATGAG     |
| Ctsc-1F  | CACCTACCCTGATCTGCTG      |
| Ctsc-1R  | CTTCTGTTGCTTCCATCACC     |
| Ctsd-1F  | GATTATCAGAATCCCTCTGCG    |
| Ctsd-1R  | ATCAGGTCTTCCACAGAGC      |
| Ctsg-1F  | CTCCAGGAGGTGCAGCTAAG     |
| Ctsg-1R  | TCCATAGGAGACGATGCCCT     |
| CTSL1-1F | GACTGTATGGCACGAATGAG     |
| CTSL1-1R | TCTTCTCCCATATCGCTCTC     |
| Ep300-1F | TGCGTCTGTAGAGCTGTGAG     |
| Ep300-1R | TCTCTTCTCCGAAACGGGGT     |
| Ern1-1F  | AAGAAGATCCAGTCCTGCA      |
| Ern1-1R  | AAAGGGAAGTTTCGTCAGG      |
| Gap43-1F | GGAGAAAGACGCTGTAGAC      |
| Gap43-1R | CATGTTCTTGGTCAGCCTC      |
| Gnao1-1F | CACTTCAGGCTGTTTGACG      |
| Gnao1-1R | TGGAGTCGAAGAGCATGAG      |
| GNAZ-1F  | GGCAGAGGTCAGAACGCAAA     |
| GNAZ-1R  | GCTCGTCTGGTTGTCCTCATA    |
| Gnb1-1F  | CCACAAACAAGGTTTCATGC     |
| Gnb1-1R  | CCACATAATTCCCAGAAGGAG    |

|             |                          |
|-------------|--------------------------|
| Gnb2-1F     | ACACTGACCCAGATCACAG      |
| Gnb2-1R     | ACCTAGACATACTAAAGCAGGG   |
| Gnb4-1F     | GGGCTCCAGCTCTTCACTTG     |
| Gnb4-1R     | GAGGGATGGCGTGCATCTTA     |
| Gnb5-1F     | GTCTCCATCCTGTTTGGAC      |
| Gnb5-1R     | ATGCCCAAACCTCTTAGGGT     |
| Gng11-1F    | CTTCACATCGAGGATCTGC      |
| Gng11-1R    | TTTAGATACCTGTTGTCTCTGC   |
| Gng3-1F     | TATGAGTATTGGTCAAGCACG    |
| Gng3-1R     | GCCTTGGACACCTTTATCC      |
| Gng4-1F     | GACCCTGAGTCAGCTTCTC      |
| Gng4-1R     | TTCATTCCCTGCACTCCCTG     |
| Gngt1-1F    | AAAAACAGCTTCCCTGACAGAA   |
| Gngt1-1R    | AGCCTCCTTTGAGTTCCTTGA    |
| Gngt2-1F    | TGAGAAGGAGCTGTTGAGG      |
| Gngt2-1R    | CCTGTCTTGGAAATCAGATCAC   |
| GSK3A-1F    | AAGCTCTGCGATTTTGGCAGT    |
| GSK3A-1R    | GAGTTCTGGAGCACGGTAGTA    |
| Gsk3b-1F    | CTTGGACAAAGGTCTTCCG      |
| Gsk3b-1R    | AATGTGCACAAGCTTCCAG      |
| Hsd17b10-1F | GTGGCCATTAAGACATACCAC    |
| Hsd17b10-1R | AAGATTCACATTGATAACCCGC   |
| Ide-1F      | TGCATCAGGGATGAATGCA      |
| Ide-1R      | AAGAGATCGCATATAGGCCTC    |
| I11a-1F     | ATGATCTGGAAGAGACCATCC    |
| I11a-1R     | CGAGCTTCATCAGTTTGTATCTC  |
| Insr-1F     | TCAGAAAGTTTGCCCAACC      |
| Insr-1R     | GTCATCAGGTTCCGAACAG      |
| Lpl-1F      | AGAATTACTGGTTTGGATCCAG   |
| Lpl-1R      | AAATCAGCGTCATCAGGAG      |
| Lrp1-1F     | TGTATGAAGGTGGAGAGCC      |
| Lrp1-1R     | AGTTGGTAGGCTTGTGTCAGG    |
| Lrp6-1F     | GAGGAAGATCTTGATTTTCAGAGG |
| Lrp6-1R     | GTCCAATACATGTACCCAACC    |
| Ntrk1-1F    | CATACACAGACGCTTCATGAC    |
| Ntrk1-1R    | TGTGGGTACACCACAACCTG     |
| Ntrk2-1F    | AGAACGAGTATGGGAAGGA      |
| Ntrk2-1R    | TTGGGTTTGTCTCGTAGTC      |
| Pkp4-1F     | TCCATGAAAGTGAGGGATCG     |

|           |                            |
|-----------|----------------------------|
| Pkp4-1R   | CTTCCTGGTACCCACTGTC        |
| Plat-1F   | TTATTGTCGGAATCCAGATGGT     |
| Plat-1R   | TCACAGTATTCCCACGTCAG       |
| Plau-1F   | ACAATTACTGCAGGAACCC        |
| Plau-1R   | ATTCTTGGACAAACTGCCT        |
| Plg-1F    | CCACGTACCCAACACTCTC        |
| Plg-1R    | TCATCATTGTCTGGGTTTCCT      |
| Prkca-1F  | AGTCGGGAAATTTAAGGAGC       |
| Prkca-1R  | TTCAGATCCCTGTAAATGATCC     |
| Prkcb-1F  | AGAACCACAAATTCACCGC        |
| Prkcb-1R  | AAAGCAGCAGACTTGACAC        |
| Prkcd-1F  | TGAGTTCTGGCTGGATCTG        |
| Prkcd-1R  | GTTTAATGGCTCCACGACG        |
| Prkce-1F  | TTTGGCAAGGTCATGTTGG        |
| Prkce-1R  | CGTCTTGTAGGATAACGTCCT      |
| PRKCG-1F  | CCTGCAATGTCAAGTCTGTAG      |
| PRKCG-1R  | ACACTCGAAGGTCACAAATTC      |
| Prkci-1F  | ACGATGAGGATATCGATTGGG      |
| Prkci-1R  | CTGGAAGCAAGAATGCAGC        |
| Prkcq-1F  | AACCGTGGAACCTACTCC         |
| Prkcq-1R  | TGAGGTTTCAGCTCTAACCA       |
| Prkcz-1F  | GTGCAGCGAAAGGATATGG        |
| Prkcz-1R  | GACAGAATCCATATGCCTCCT      |
| Psen1-1F  | GCTCTTATCTATTTCCTCAACAATGG |
| Psen1-1R  | CTTGGGTACCCTCCTTTGG        |
| Psen2-1F  | CAGAGATGGAAGAAGACTCCT      |
| Psen2-1R  | AAGATGAAGTCTCCAGGC         |
| Snca-1F   | GAGTCCTCTATGTAGGTTCCA      |
| Snca-1R   | CTTGCTCTTTGGTCTTCTCAG      |
| Sncb-1F   | CTATGTCGGAAGCAAGACCA       |
| Sncb-1R   | CAGAGAACACAGCTCCTCC        |
| Ubqln1-1F | AATCCTCAGCTGCAGAGTC        |
| Ubqln1-1R | TTCACGGTTCAAGAATCCCA       |
| Uqcrc1-1F | CTTTCAAGGGAACAAAGAATCG     |
| Uqcrc1-1R | TGTAGGCATTAAGATGAGCC       |
| Uqcrc2-1F | AGCAGGCAGTAGATATGAGG       |
| Uqcrc2-1R | CCTTTGGTAGTCAAACCTAGATGC   |
| mINS-1 F1 | CACCCACCTGGAGACCTTA        |
| mINS-1 R1 | CCACACACCAGGTAGAGAGC       |

4 **Supplementary Table 2: qPCR primers of core clock genes**

|               |                           |
|---------------|---------------------------|
| mDBP_mrna-f   | CCTGAGGAACAGAAGGATGA      |
| mDBP_mrna-r   | ATCTGGTTCTCCTTGAGTCTTCTTG |
| mCRY2-F1      | GCCTCTGCCTCCCTTGATTT      |
| mCRY2-R1      | TGACATAAGCAGCATGGGCA      |
| mCLOCK-F1     | CACGCGCTCCCCTGAAAG        |
| mCLOCK-R1     | GTCCTTGTCATCTTCTTCCACCA   |
| mCRY1-F2      | AGCTCGTGTCCGTTTCGTG       |
| mCRY1-R2      | CCTGCGCTTCCAAGAAAACC      |
| mBMAL1_mrna-f | CTCGACACGCAATAGATGGGA     |
| mBMAL1_mrna-r | CTTCCTTGGTCCACGGGTT       |
| mPER1_mrna-f  | TGAAGCAAGACCGGGAGAG       |
| mPER1_mrna-r  | CACACACGCCATCACATCAA      |
| mPER2_mrna-f  | GAAAGCTGTCACCACCATAGAA    |
| mPER2_mrna-r  | AACTCGCACTTCCTTTTCAGG     |
| mNR1D1 qPCR F | TGGCATGGTGTACTGTGTAAGG    |
| mNR1D1 qPCR R | ATATTCTGTTGGATGCTCCGGCG   |
| mNR1D2 qPCR F | GGAGTTCATGCTTGTGAAGGCTGT  |
| mNR1D2 qPCR R | CAGACACTTCTTAAAGCGGCACTG  |

5

6

7

8 **Supplementary Table 3: qPCR primers of housekeeping genes, *orexin precursor***  
 9 **gene and orexin receptors**

|                |                        |
|----------------|------------------------|
| mActin_mrna-nf | GGCTGTATTCCCCTCCATCG   |
| mActin_mrna-nr | CAGTTGGTAACAATGCCATGT  |
| mGapdh_mrna-nf | GACCTCAACTACATGGTCTACA |
| mGapdh_mrna-nr | ACTCCACGACATACTCAGCAC  |
| mOrexin-PreF1  | CCTGCCGTCTCTACGAACTG   |
| mOrexinPreR1   | GGTGCTAAAGCGGTGGTAGT   |
| Hcrtr1 F3      | CTGTGGCGCGATTATCTCTAC  |
| Hcrtr1 R3      | GCCAGGGACAGGTTGACAA    |
| Hcrtr2 F3      | GAGGATTCCCTCTCTCGTCG   |
| Hcrtr2 R3      | GGTGTAGGTATTCCCCTCCACA |

10

11

12 **Supplementary Table 4: Primers for amplified the coding sequence of E4BP4 and**  
 13 **the promotor regions of *BACE1* and *BACE2***

|                     |                                     |
|---------------------|-------------------------------------|
| Human E4BP4 F       | ACCGGCGGCCGCATGCAGCTGAGAAAAATGCA    |
| Human E4BP4 R       | ACCGGGCGCGCCTTACCCAGAGTCTGAAGCAG    |
| BACE1 pro gen-REV R | AGCTAAGCTTTTGGGCCAAGGTGGGCCCCG      |
| BACE1 pro 1k        | ATCCGGTACCTTGCAGCCTGGAAAACTCT       |
| BACE2 pro gen-REV R | AGCTAAGCTTGTGCGCCCAAGCCCACGGCG      |
| BACE2 pro 1.4k      | ATCCGGTACCTTGTTTTTTAAAACAGCCAACATAA |

14

15
